# Supplementary material
Source: PubMed Central journal article supplement (PMC5877478)

**Fig. S1. Map of study sites.** Locations of hibernacula included in this study (stars) are shown at the county level. Shaded counties indicate reported presence of *Pseudogymnoascus destructans* or white-nose syndrome at the start of the study in August 2012.

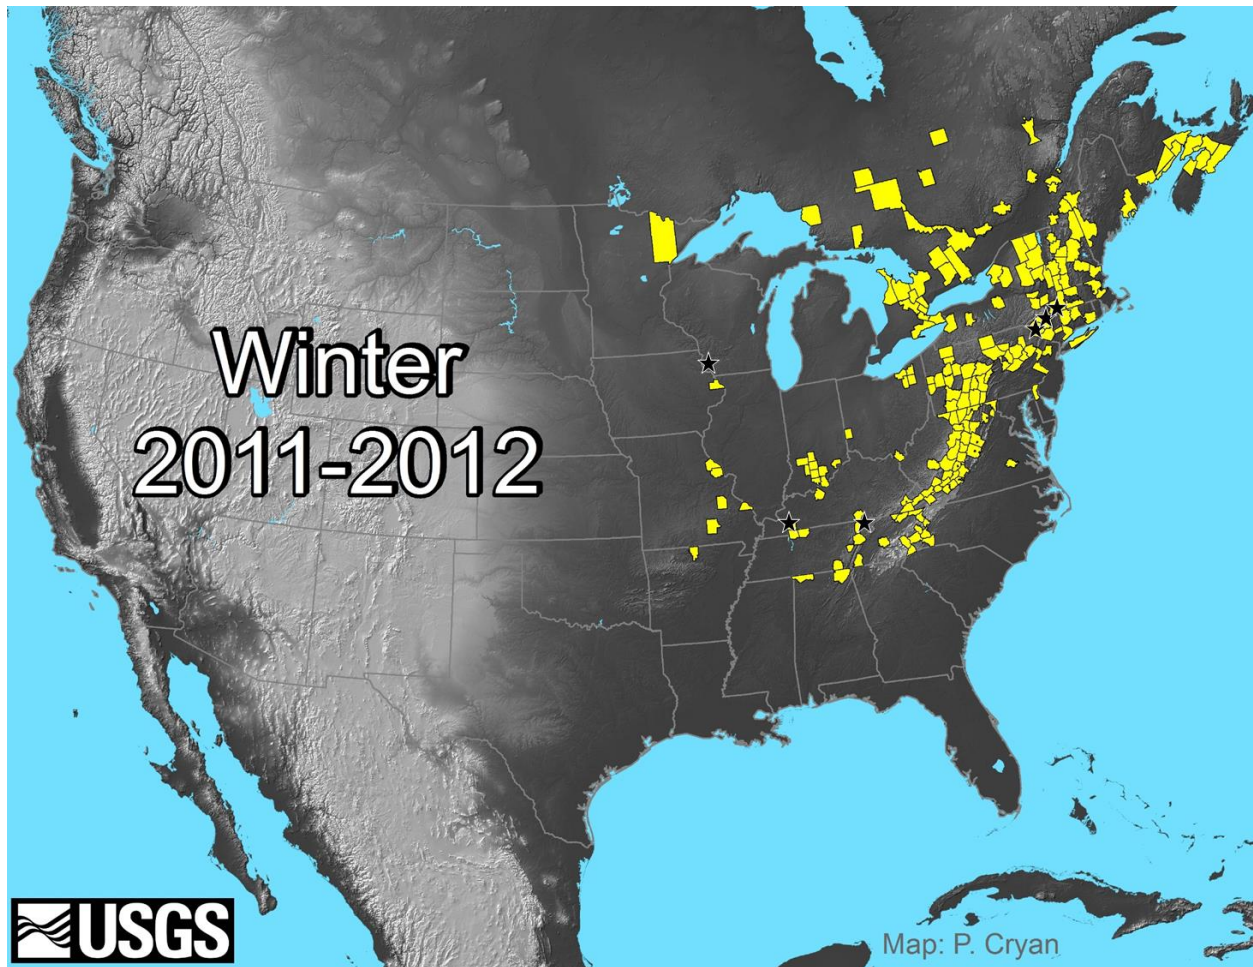

Supplement: NIHMS924581-supplement-Supp_FigS1.pdf [file NIHMS924581-supplement-Supp_FigS1.pdf]
