# Supplementary material
Source: PubMed Central journal article supplement (PMC5877478)

**Fig. S2. Temperatures across regions within study hibernacula**

Temperature was recorded using multiple iButton data-loggers within three regions of each hibernaculum from 2012 to 2014, and within WI, TN and KY in 2015. Regions varied by distance from the site entrance (14 to 336 m across all sites). Mean daily temperatures over the study period are shown by region with standard deviation (error bars).

**Fig. S2**

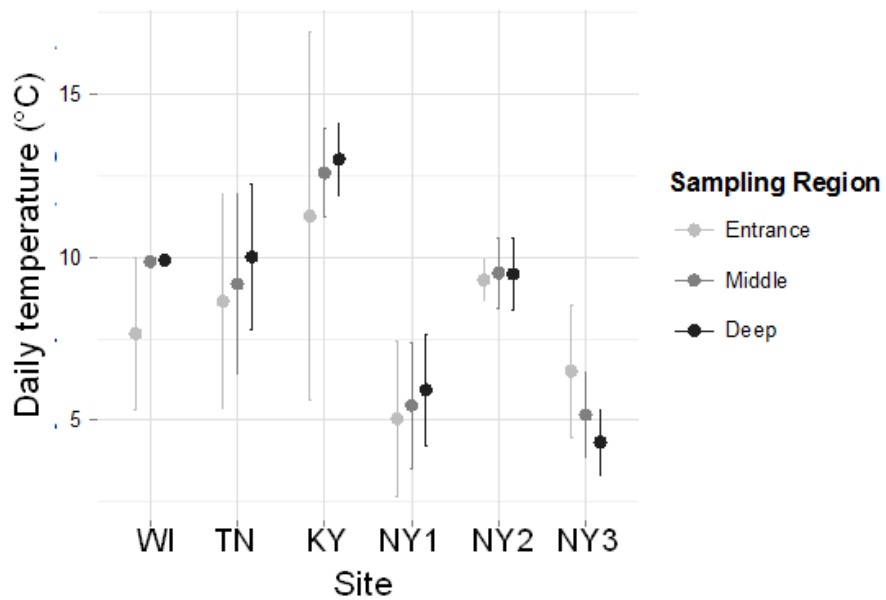

Supplement: NIHMS924581-supplement-Supp_FigS2.pdf [file NIHMS924581-supplement-Supp_FigS2.pdf]
